# Supplementary material for: Alternative assembly of respiratory complex II connects energy stress to metabolic checkpoints
Source: PubMed Central journal article supplement (PMC5992162; doi:10.1038/s41467-018-04603-z), 2018-06-07
Supplement: 41467_2018_4603_MOESM1_ESM.pdf [file 41467_2018_4603_MOESM1_ESM.pdf]

**Alternative assembly of respiratory complex II connects energy stress to metabolic checkpoints**

Bezawork-Geleta et al.

Supplementary Information

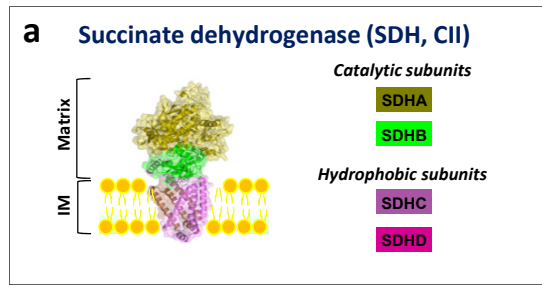

**b**

| Cell lines                               | Genetic modification | SDHA expression (%) | SDHB expression (%) | SDHC expression (%) | SDHD expression (%) |
|------------------------------------------|----------------------|---------------------|---------------------|---------------------|---------------------|
| Parental                                 | -                    | 100                 | 100                 | 100                 | 100                 |
| SDHB <sup>KO</sup>                       | TALEN                | 100                 | nil                 | nil                 | n.d.*               |
| SDHB <sup>KO</sup> EV                    | TALEN (Empty Vector) | 100                 | nil                 | nil                 | n.d.                |
| SDHB <sup>KO</sup> SDHA <sup>low-1</sup> | TALEN RNAi/shRNA     | 25                  | nil                 | nil                 | n.d.                |
| SDHB <sup>KO</sup> SDHA <sup>low-2</sup> | TALEN RNAi/shRNA     | 35                  | nil                 | nil                 | n.d.                |

\*n.d., not determined experimentally, since there is no available anti-SDHD IgG; It is expected that the level of SDHD is similar to that of SDHC.

**Supplementary Figure 1** Crystal structure showing assembly of CII subunits and their steady state level in MDA231 sublines. **a** Crystal structure of fully assembled CII as determined from porcine mitochondria PDB:1ZOY. **b** Gene editing and RNAi techniques used to generate MDA231 sublines.

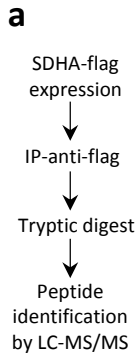

| N  | Score | %Cov(95) | Accession | Protein ID  | Name                                                         | Peptide(s)(95%) |
|----|-------|----------|-----------|-------------|--------------------------------------------------------------|-----------------|
| 1  | 26.21 | 21.74    | P04264    | K2C1_HUMAN  | Keratin, type II cytoskeletal 1                              | 13              |
| 2  | 15.04 | 12.67    | P13665    | K1C1G_HUMAN | Keratin, type I cytoskeletal 10                              | 7               |
| 3  | 11.07 | 10.59    | F35527    | K1C9_HUMAN  | Keratin, type I cytoskeletal 9                               | 6               |
| 4  | 10.63 | 31.93    | Q90X18    | SDHF2_HUMAN | Succinate dehydrogenase assembly factor 2, mitochondrial     | 6               |
| 5  | 7.72  | 8.764    | P35908    | K2Z2_HUMAN  | Keratin, type II cytoskeletal 2 epidermal                    | 5               |
| 6  | 5.9   | 22.02    | Q9GZ73    | SLRP_HUMAN  | SRA stem-loop-interacting RNA-binding protein, mitochondrial | 2               |
| 7  | 5.05  | 23.65    | Q04837    | SSBP_HUMAN  | Single-stranded DNA-binding protein, mitochondrial           | 3               |
| 8  | 4.46  | 16.95    | P62316    | SMO2_HUMAN  | Small nuclear ribonucleoprotein Sm O2                        | 3               |
| 9  | 4.09  | 24.07    | Q5VIM1    | SDHF4_HUMAN | Succinate dehydrogenase assembly factor 4, mitochondrial     | 2               |
| 10 | 4     | 15.2     | P62899    | RL3_HUMAN   | 60S ribosomal protein L31                                    | 2               |
| 11 | 3.92  | 13.1     | F39019    | RS19_HUMAN  | 40S ribosomal protein S19                                    | 2               |
| 12 | 3.66  | 15.08    | P62318    | SMO3_HUMAN  | Small nuclear ribonucleoprotein Sm O3                        | 2               |
| 13 | 2.82  | 8.097    | Q07477    | TRYP1_HUMAN | Trypsin-1                                                    | 5               |
| 14 | 2.25  | 10.43    | P05387    | RLA2_HUMAN  | 60S acidic ribosomal protein P2                              | 1               |
| 15 | 2.03  | 7.149    | P62829    | RL23_HUMAN  | 60S ribosomal protein L23                                    | 1               |
| 16 | 2     | 11.11    | P06309    | KYD5_HUMAN  | Ig kappa chain V-J region-GM607 (Fragment)                   | 1               |
| 17 | 2     | 8.462    | Q09285    | RT17_HUMAN  | 28S ribosomal protein S17, mitochondrial                     | 1               |
| 18 | 2     | 7.346    | Q5P161    | RMS4_HUMAN  | 39S ribosomal protein S4, mitochondrial                      | 1               |
| 19 | 2     | 8.966    | Q15388    | TOM20_HUMAN | Mitochondrial import receptor subunit TOM20 homolog          | 1               |
| 20 | 2     | 16.81    | P62314    | SMO1_HUMAN  | Small nuclear ribonucleoprotein Sm O1                        | 1               |
| 21 | 2     | 2.463    | Q07308    | ALBU_HUMAN  | Serum albumin                                                | 1               |
| 22 | 1.57  | 6.618    | P61553    | RL27_HUMAN  | 60S ribosomal protein L27                                    | 1               |
| 23 | 1.51  | 6.977    | Q087M1    | H2AU_HUMAN  | Histone H2A.1                                                | 1               |
| 24 | 1.33  | 5.978    | Q36644    | RT25_HUMAN  | 28S ribosomal protein S25, mitochondrial                     | 1               |
| 25 | 1.26  | 4.79     | Q09612    | RT24_HUMAN  | 28S ribosomal protein S24, mitochondrial                     | 1               |
| 26 | 0.97  | 5.797    | Q15235    | RT23_HUMAN  | 28S ribosomal protein S23, mitochondrial                     | 1               |
| 27 | 0.92  | 8.491    | Q09291    | RT33_HUMAN  | 28S ribosomal protein S33, mitochondrial                     | 1               |

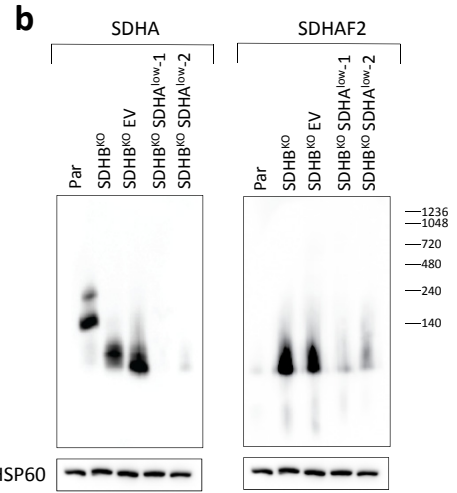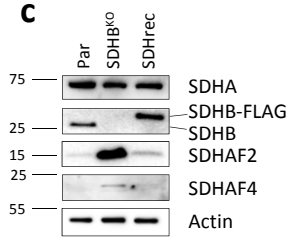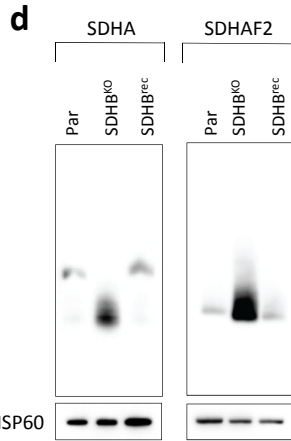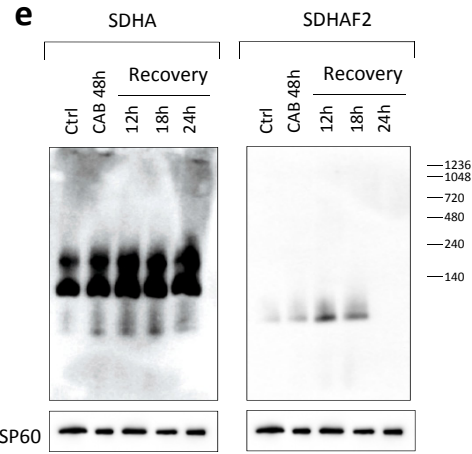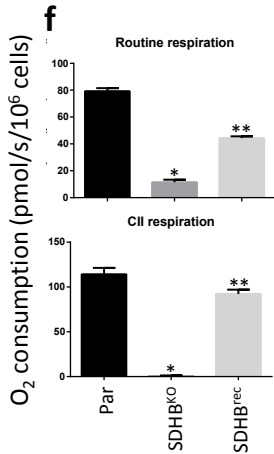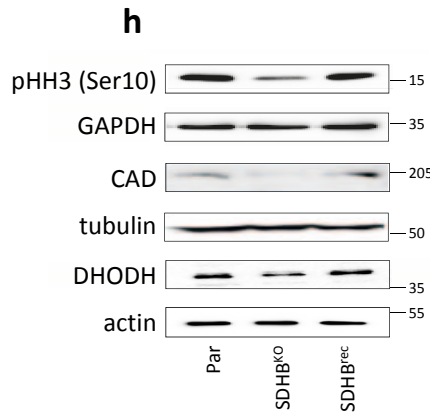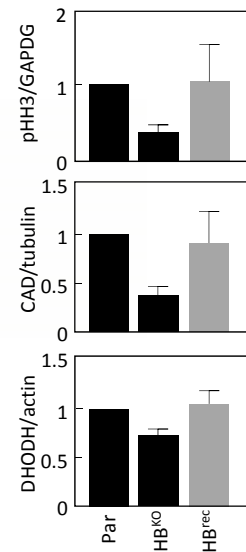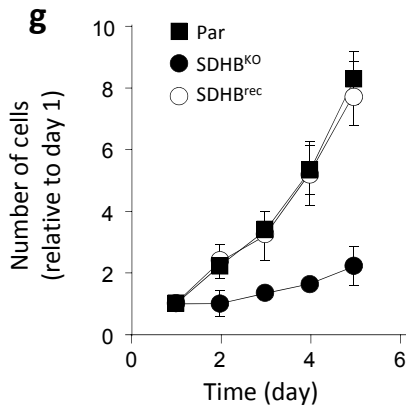

**Supplementary Figure 2** SDHB<sup>KO</sup> cells transfected with SDHA-FLAG were processed as indicated in the flow chart on the left, and the proteins identified by MS are shown in the table on the right (**a**). **b** Cells were subjected to NBGE followed by WB for SDHA and SDHAF2. Parental, SDHB<sup>KO</sup> and SDHB<sup>KO</sup> cells expressing SDHB-FLAG (SDHB<sup>rec</sup> cells) were subjected to SDS-PAGE and assessed for the level of SDHA, SDHB, SDHAF2 and SDHAF4 by WB (**c**) and analyzed by NBGE followed by WB for the level of SDHA and SDHAF2 (**d**). **e** Parental cells were exposed to CAB for 48 h, allowed to recover for the time periods shown, and assessed for the level of SDHA and SDHAF2 using NBGE followed by WB. The data shown comes from the same mitochondrial preparation, the same HSP60 control therefore applies to both panels. Parental, SDHB<sup>KO</sup> and SDHB<sup>rec</sup> cells were assessed for routine and CII-dependent oxygen consumption (**f**), proliferation in galactose- and glucose-containing media (n=4) (**g**), and for the level of pHH(Ser10), CAD and DHODH using SDS-PAGE and WB (**h**). Images are representative of three independent experiments. Data in panel **f** are mean values  $\pm$  S.D. The symbol \* indicates significant differences compared to parental cells with  $p < 0.05$  and \*\* significant differences compared to SDHB<sup>KO</sup> cells with  $p < 0.05$ ., One-way ANOVA, GraphPad Prism 6.0, n = 4.

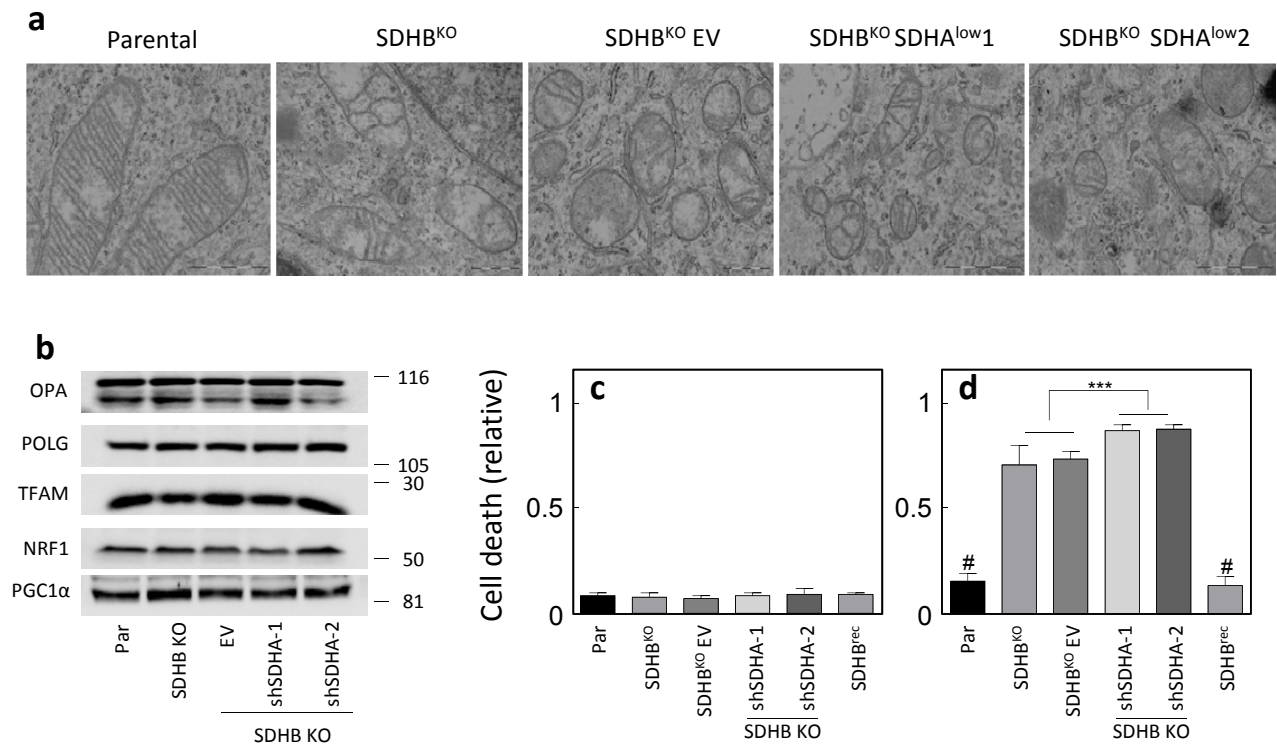

**Supplementary Figure 3** **a** Cells were evaluated for mitochondrial morphology using TEM (scale bar, 1  $\mu$ m) and for the level of expression of OPA, POLG, TFAM, NRF1 and PGC1 $\alpha$  using SDS-PAGE/WB (**b**). Cell lines, as indicated, were maintained in glucose- (**c**) and galactose-containing media (**d**) and assessed for cells death using standard annexin V/PI assay. Images in panels (**a**) and (**b**) are representative of three independent experiments, data in panels (**c**) and (**d**) are mean values  $\pm$  S.D. (n=4), with the symbol \*\*\* indicating significant difference between SDHB<sup>KO</sup> and SDHB<sup>KO</sup> EV cells versus SDHB<sup>KO</sup> SDHA<sup>low</sup> cells with  $p < 0.05$ , the symbol # significant difference between SDHB<sup>KO</sup>, SDHB<sup>KO</sup> EV and SDHB<sup>KO</sup> SDHA<sup>low</sup> cells versus parental and SDHB<sup>rec</sup> cells with  $p < 0.0001$ , one-way ANOVA, GraphPad Prism 6.0.

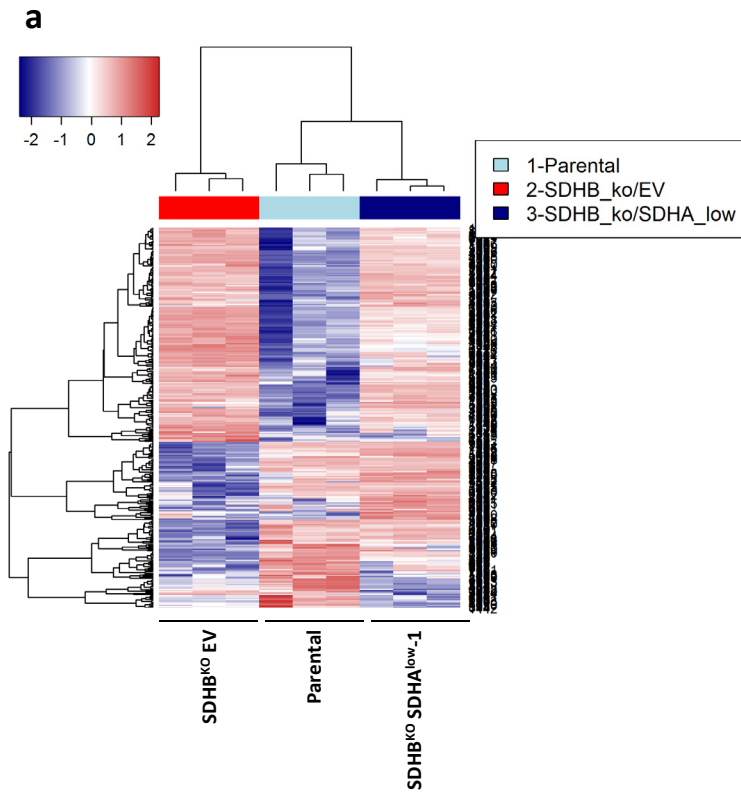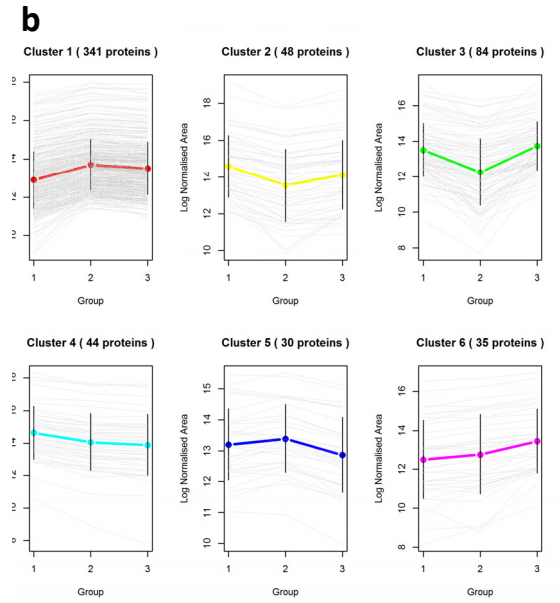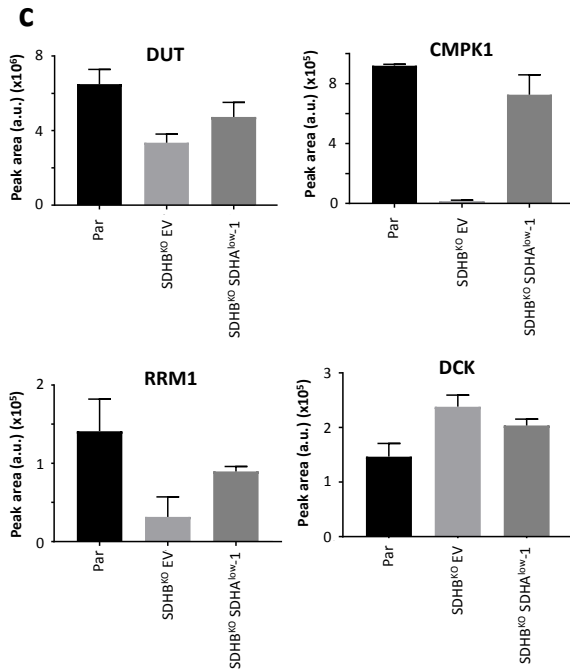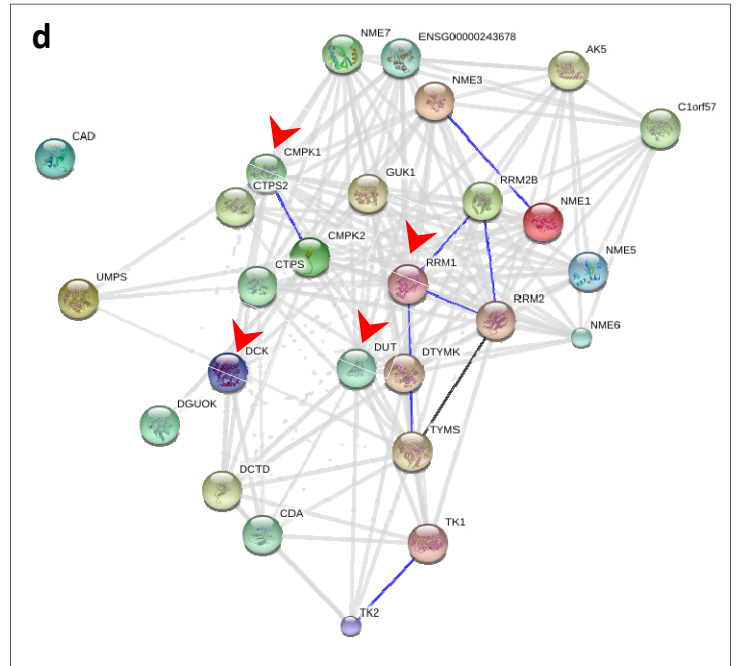

**Supplementary Figure 4** Effects of change in SDHA assembly in proteome of MDA231 sublines. **a** Unsupervised hierarchical clustering of protein expression data from SWATH-MS analysis for indicated sublines. **b** Cluster of proteins with distinct differential expression among MDA231 sublines. Dots connected by solid lines indicate median of log transformed normalized peak area that indicate the steady state of the protein. Vertical lines indicate the corresponding interquartile range. Gray lines mark the individual protein steady state in the cluster. **c** Peak area of several peptides identified by SWATH-MS analysis for most differentially expressed proteins that are involved in the *de novo* pyrimidine pathway. DUT, deoxyuridine 5'-triphosphate nucleotidohydrolase; CMPK1, cytidine/uridine monophosphate kinase 1; RRM1, ribonucleoside-diphosphate reductase large subunit; negative regulator DCK, deoxycytidine kinase. Error bars represent SD, n=3. Those proteins are highlighted with red arrows on a complete picture of STRING interaction network for pyrimidine deoxyribonucleotide *de novo* biosynthesis (accessed from Pathcard) in panel **d**.

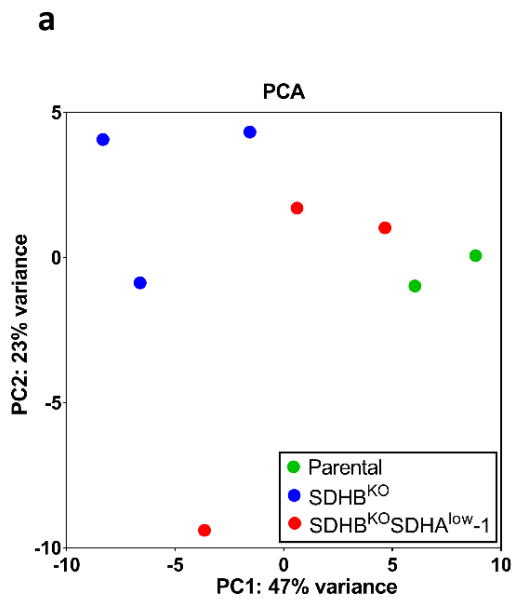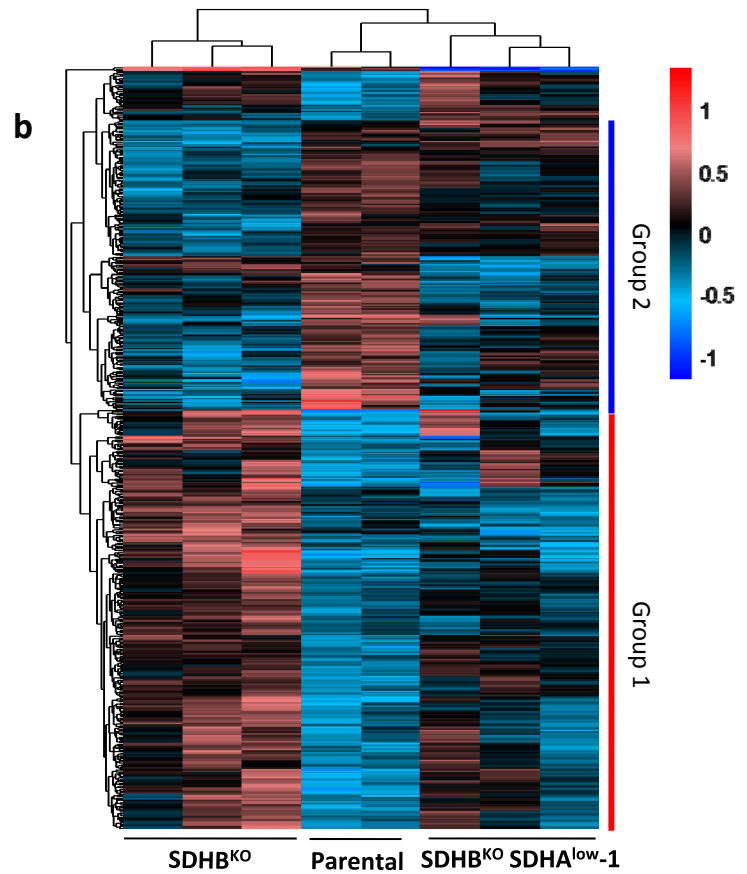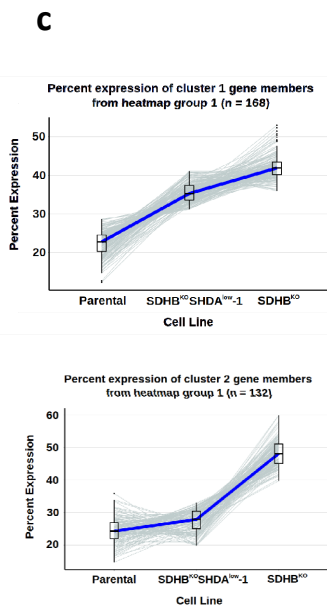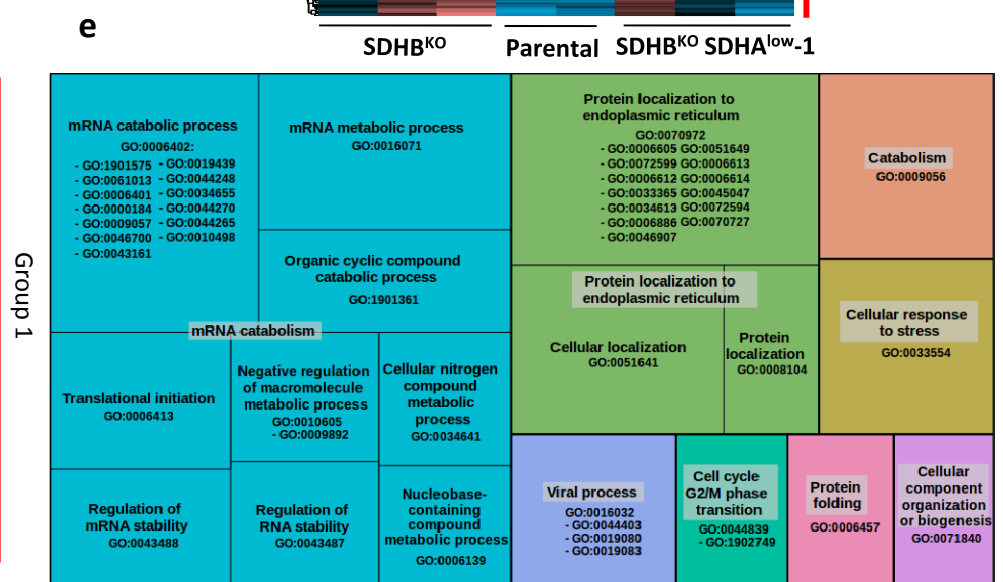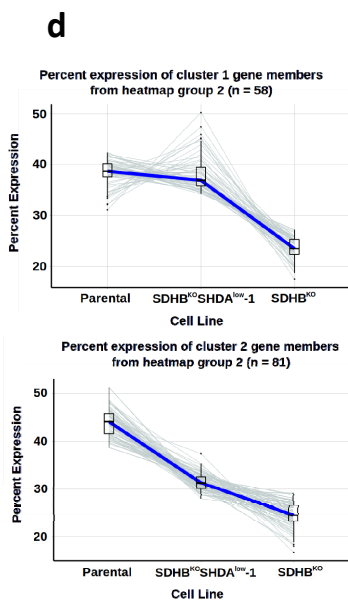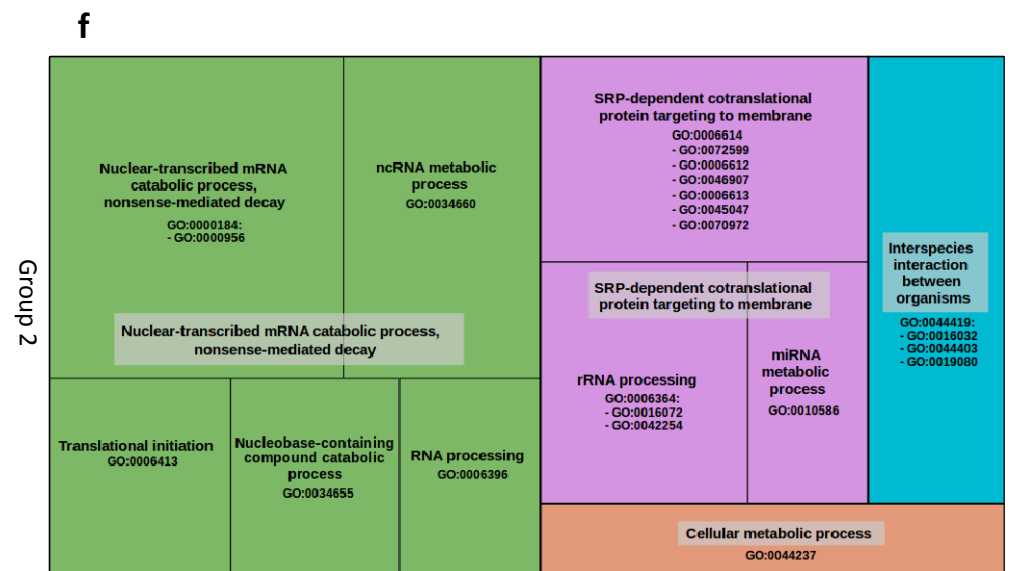



**Supplementary Figure 5. RNA sequence analysis of parental, SDHB<sup>KO</sup> and SDHB<sup>KO</sup> SDHA<sup>low</sup> cells.** **a** Principle component analysis of parental, SDHB<sup>KO</sup> and SDHB<sup>KO</sup>SDHA<sup>low</sup> cells. **b** Heatmap of gene expression for genes differentially expressed between the tested cell lines. Direction and fold change in expression compared to the average across all cell lines are color-coded as indicated. The groups of genes used for the gene set enrichment analysis are highlighted in the right margin. **c, d** Clusters of differentially expressed genes that showed **(c)** lower or **(d)** higher transcript abundance in the parental and SDHB<sup>KO</sup>SDHA<sup>low</sup>-1 cell lines relative to the SDHB<sup>KO</sup> cell line (i.e. transcripts the expression of which was reverted back towards the parental cell levels by SDHA knockdown in SDHB<sup>KO</sup> cells). The trend line is based on the median of the expression value of all genes for a given cell line. Clusters in **(c)** are contained in group 1 in the heatmap, and clusters from **(d)** in group 2. **e, f** Treemaps showing the significant biological processes involving gene members of **(e)** group 1 from the heatmap, or **(f)** group 2 from the heatmap. The major representative and sub-representative GO terms comprising each category are indicated. Each rectangle of the treemap represents a cluster of GO terms involved in similar biological processes. The size of the rectangle is reflective of the p-value significance of the biological process. The boxes of similar color share similar overall processes, while those of different color are more distant.

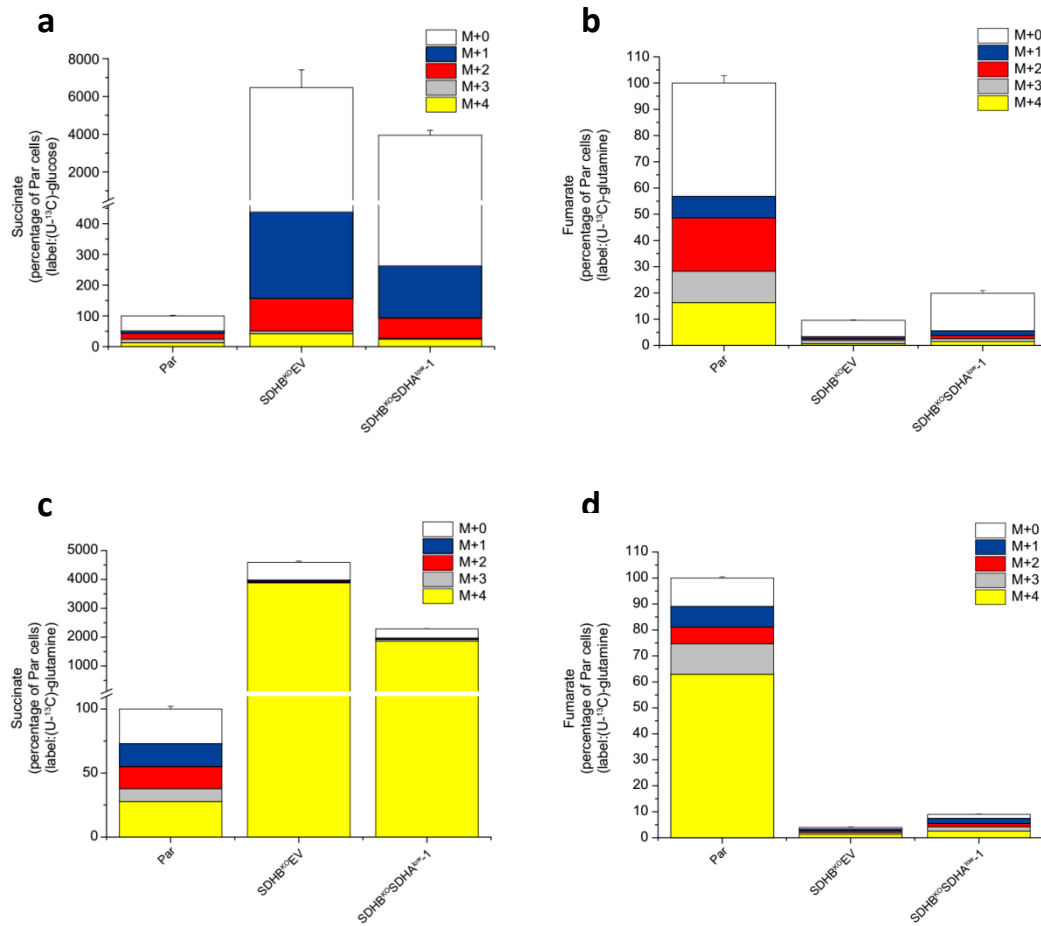

**Supplementary Figure 6** Isotopologue distribution of intracellular succinate (**a**, **c**) and fumarate (**b**, **d**) after incubation for 24 h with 5 mM unlabeled glucose and 20 mM U-<sup>13</sup>C-glucose (**a**, **b**) or 4 mM U-<sup>13</sup>C-glutamine (**c**, **d**), respectively. All data are presented as mean ± S.D., n=3.

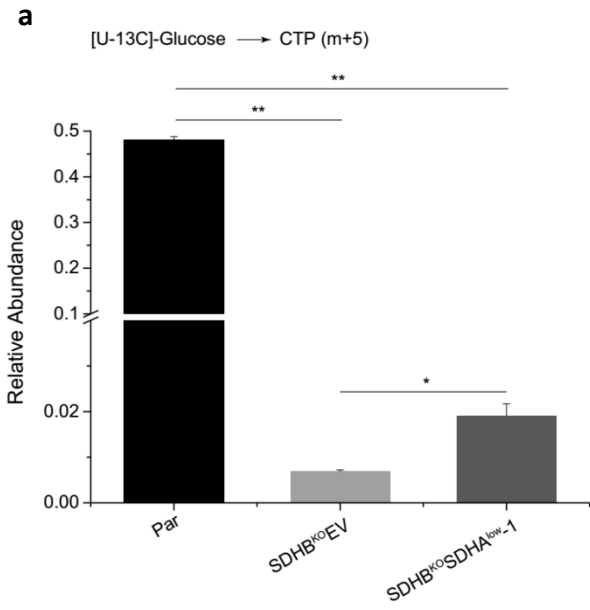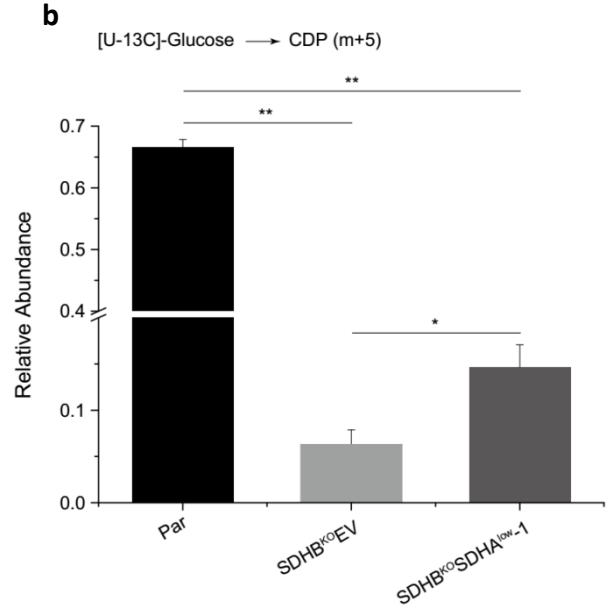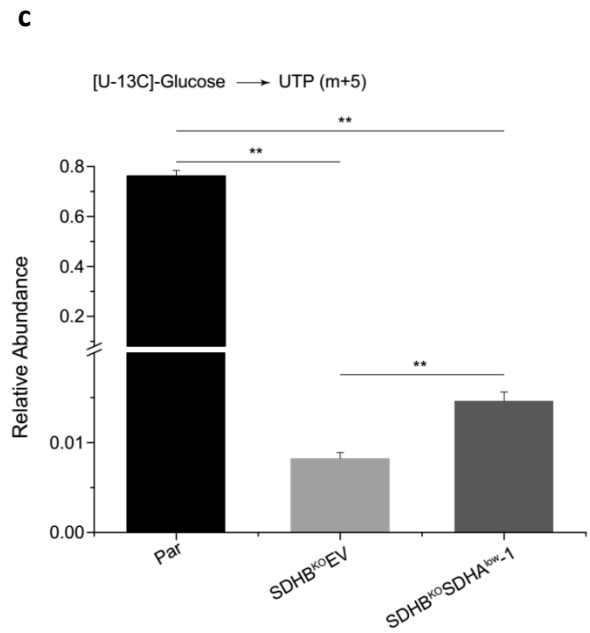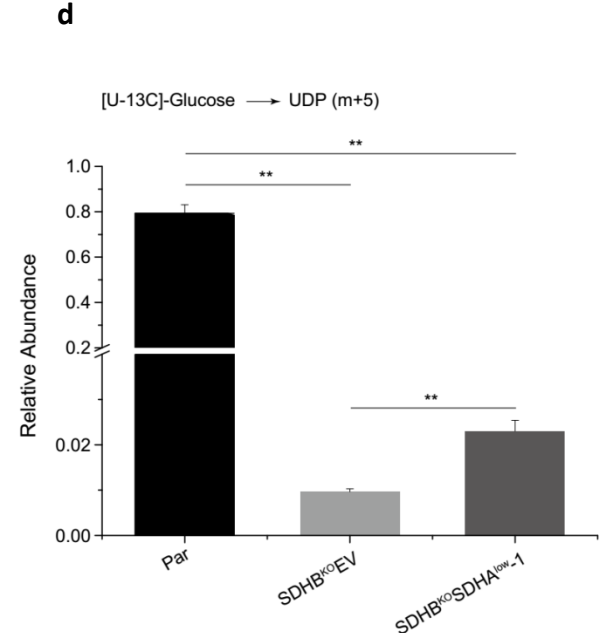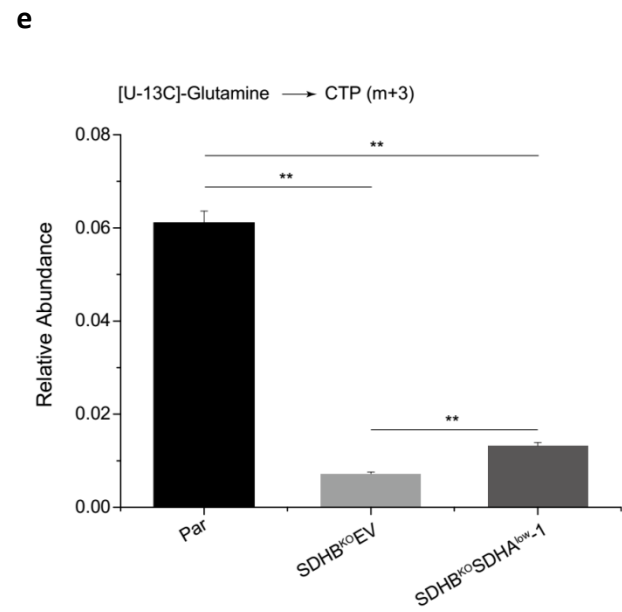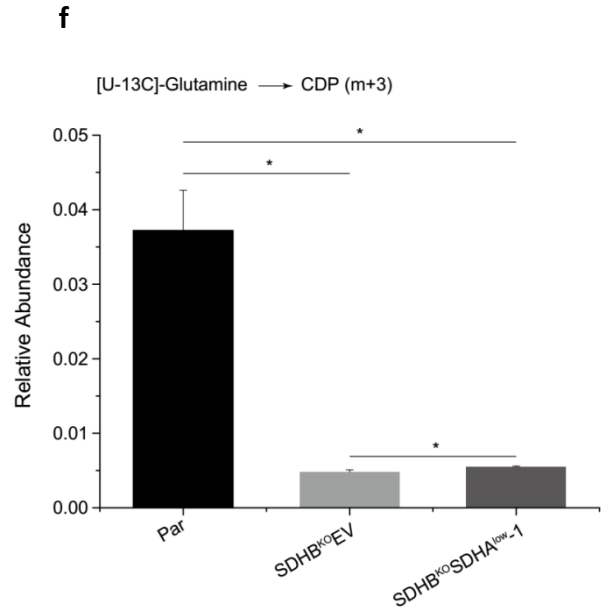

**Supplementary Figure 7.** Incorporation of  $^{13}\text{C}$  label from glucose or glutamine to pyrimidines. **(a - d)** Relative isotopomer amounts (M+5) of CTP, CDP, UTP and UDP were assessed by LC-MS/MS using  $[\text{U-}^{13}\text{C}]$  glucose. **(e and f)** Relative isotopomer amounts (M+3) of CTP and CDP were assessed by LC-MS/MS using  $[\text{U-}^{13}\text{C}]$  glutamine as tracers. Data shown are mean values  $\pm$  SD ( $n \geq 3$ ); The symbol \*\* indicates differences with  $p < 0.05$  (unpaired t-test).

# Uncropped scans from Figure 1

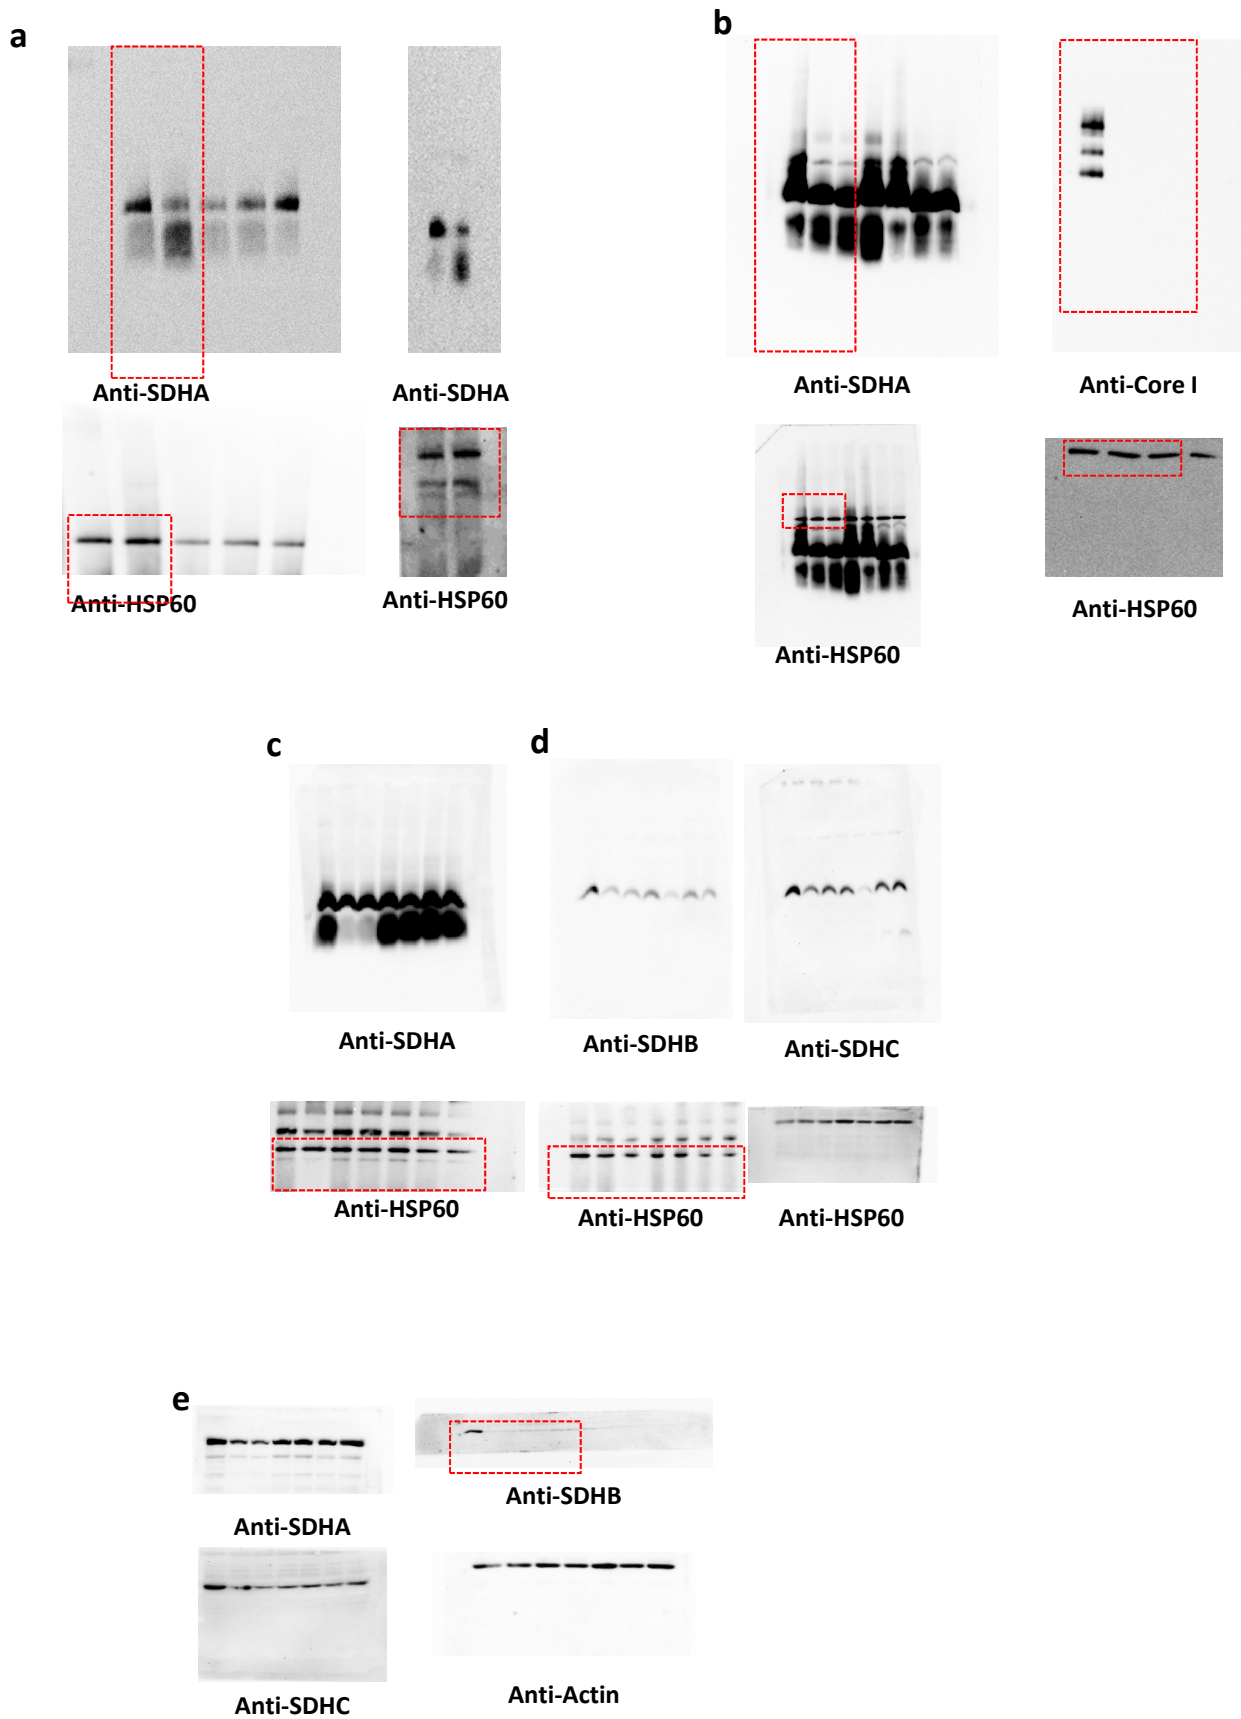

## Uncropped scans from Figure 2

c

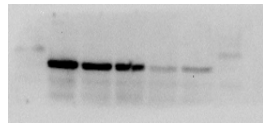

Anti-SDHA

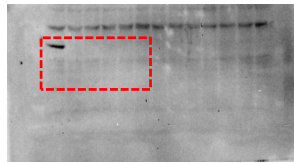

Anti-SDHB

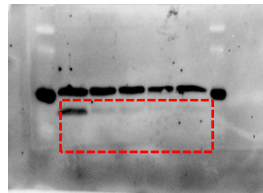

Anti-SDHC

d

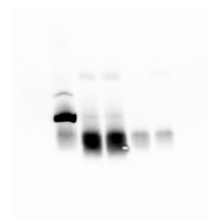

Anti-SDHA

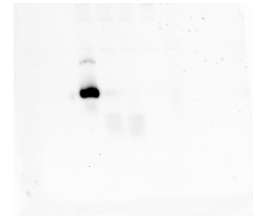

Anti-SDHB

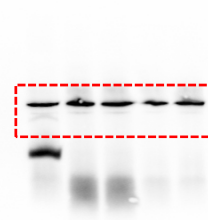

Anti-HSP60

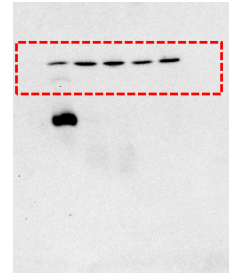

Anti-HSP60

## Uncropped scans from Figure 3

g

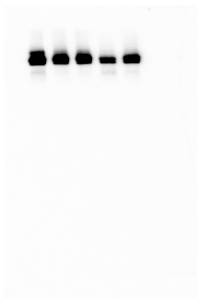

Anti-NDUFA9

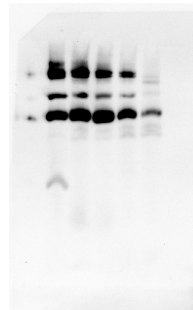

Anti-Core I

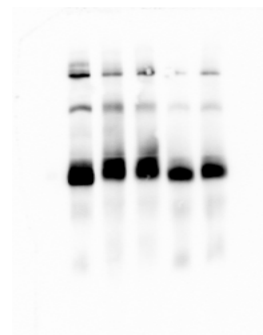

Anti-COXVa

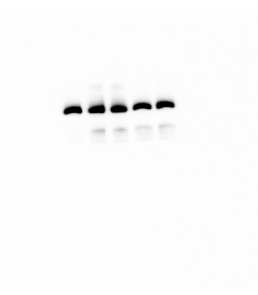

Anti-ATP5

h

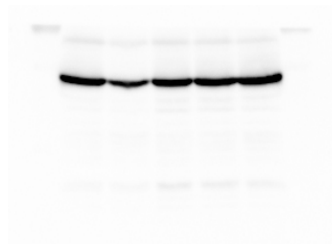

Anti-Core I

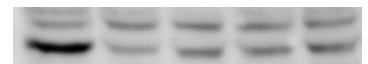

Anti-NDUFV1

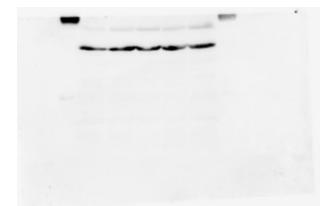

Anti-ATP5

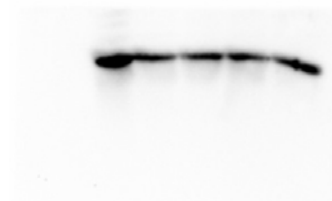

Anti-NDUFS8

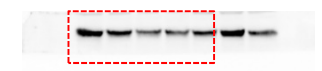

Anti-NDUFA9

## Uncropped scans from Figure 4

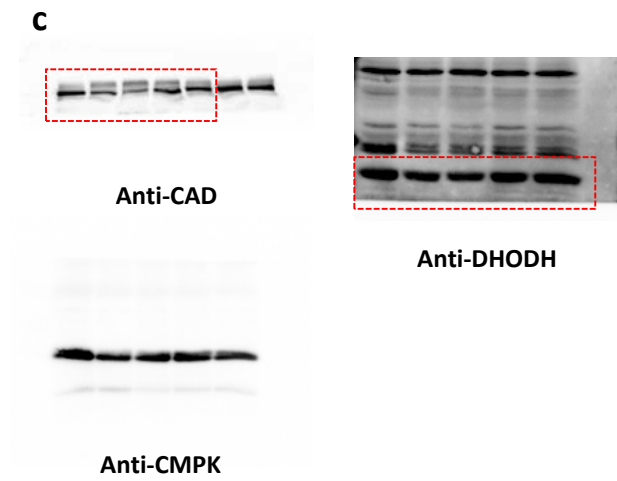

## Uncropped scans from Figure 5

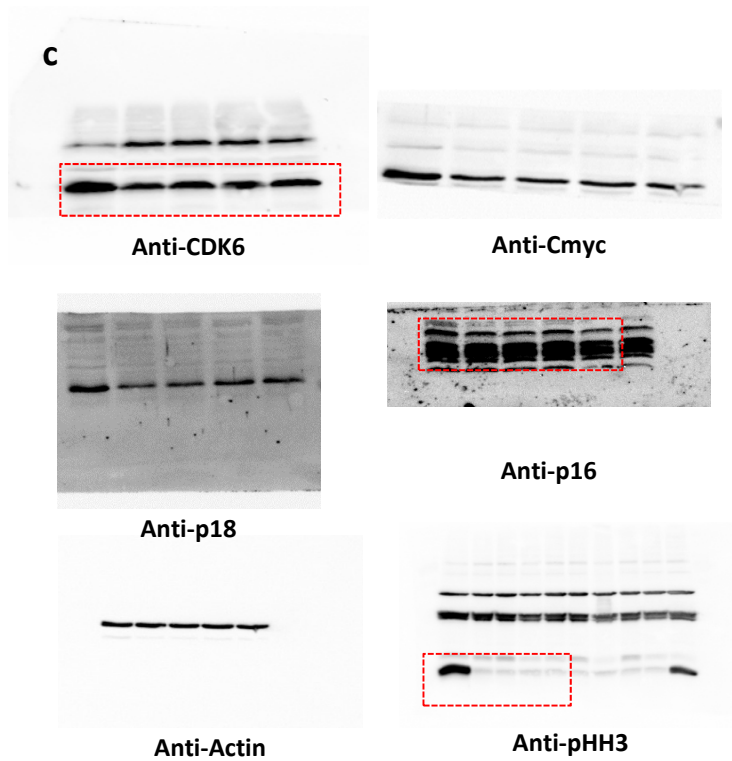

# Uncropped scans from Figure 8

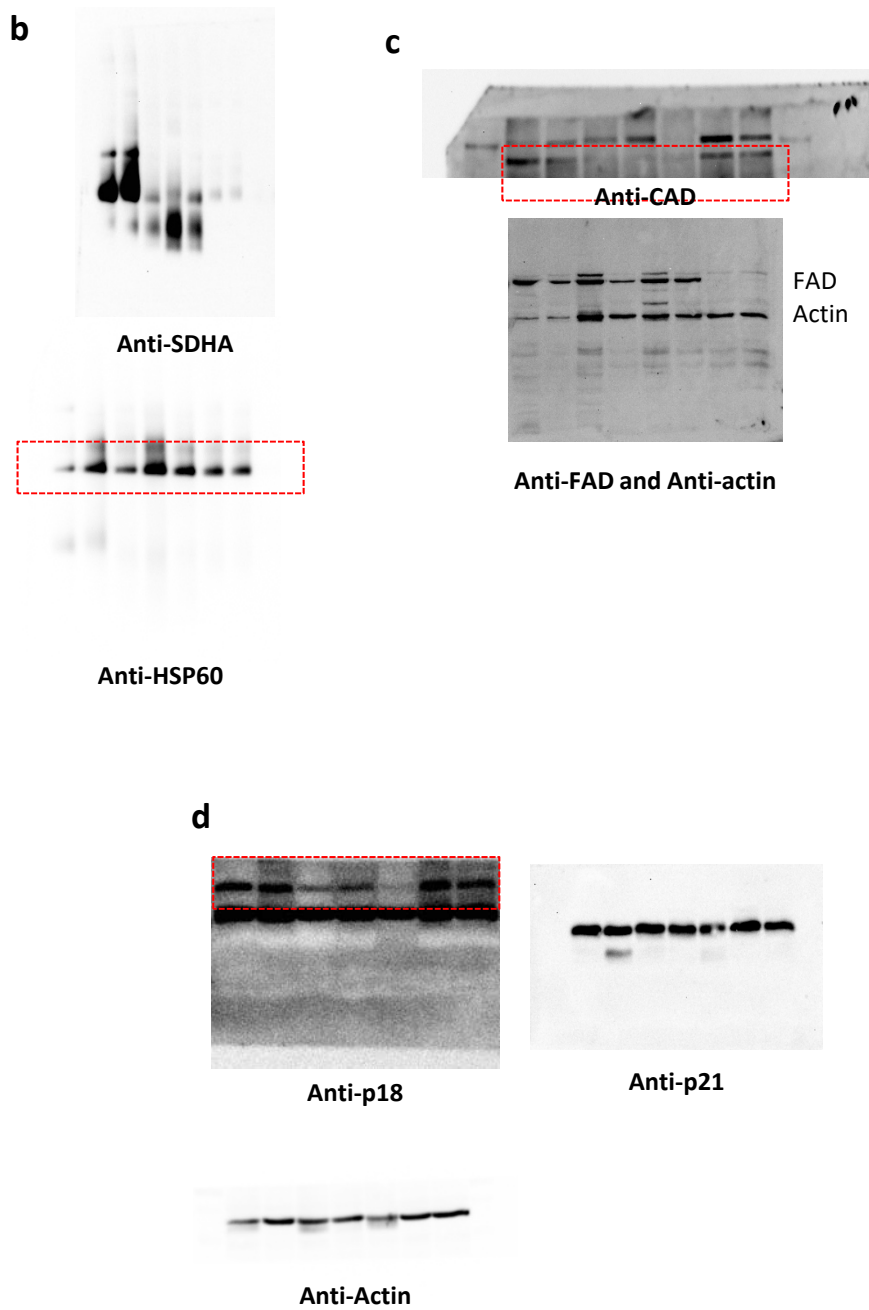



# Uncropped scans from Supplementary Figure 2

The main figure already contains images of full-length membranes for NBGE

**b**

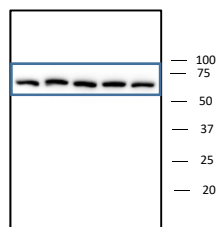

Hsp60

**c**

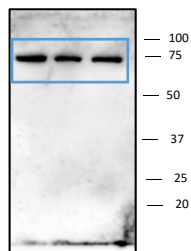

SDHA

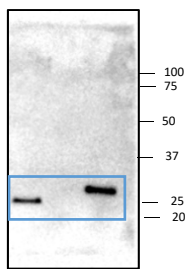

SDHB

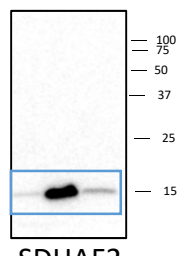

SDHAF2

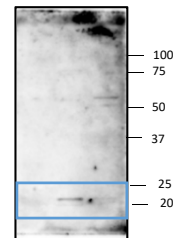

SDHAF4

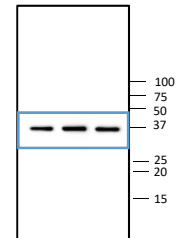

Actin

**d**

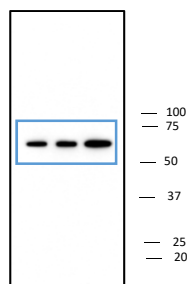

Hsp60, left

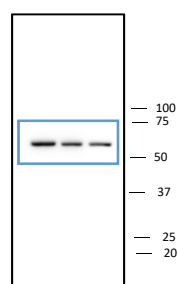

Hsp60, right

**e**

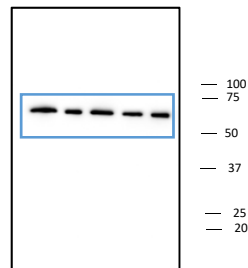

Hsp60

**h**

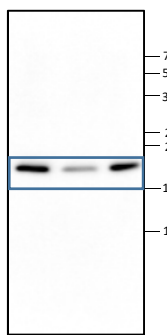

pHH3 (Ser10)

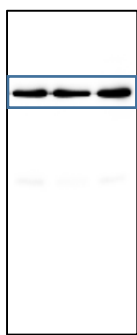

GAPDH

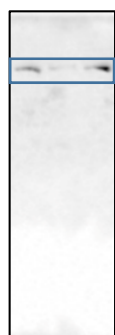

CAD

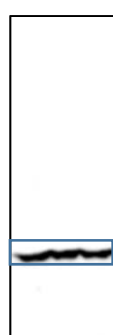

Tubulin

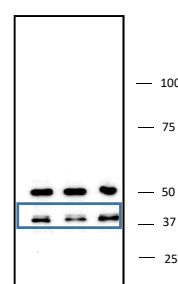

DHODH

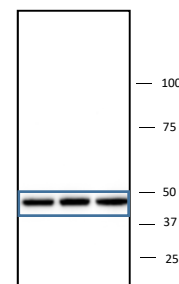

Actin

**Supplementary Figure 8.** Uncropped scans of WB membranes.
