# Supplementary material for: Alternative assembly of respiratory complex II connects energy stress to metabolic checkpoints
Source: PubMed Central journal article supplement (PMC5992162; doi:10.1038/s41467-018-04603-z), 2018-06-07
Supplement: 41467_2018_4603_MOESM2_ESM.pdf [file 41467_2018_4603_MOESM2_ESM.pdf]

## Description of Additional Supplementary Files

### **File Name: Supplementary Data 1**

**Description:** SDHA-interacting proteins. Complete data from the MS analysis following anti-flag IP for the identification of proteins interacting with SDHA in CII<sub>low</sub>.

### **File Name: Supplementary Data 2**

**Description:** MS SWATH-detected proteins.

### **File Name: Supplementary Data 3**

**Description:** Raw data and Z-score for the metabolites identified by NMR and LC-MS/MS from MDA231 sublines. The actual peak intensity of each metabolites and the calculated values of mean and standard deviation (STDEV) are provided. The Z-score was obtained by dividing the difference between actual peak intensities and mean value by the STDEV. Those bolded were identified with LC-MS/MS.
